# Supplementary material for: High-Performance, Temperature Retardant and Hydrophobic BiCoO₃:PDMS Piezoelectric Nanogenerator for Effective Energy Harvesting in Harsh Environments
Source: Research Square preprint supplement (doi:10.21203/rs.3.rs-7666722/v1), 2025-10-16
Supplement: Supplementary file 1 [file 2e233c916a10720fe8b13fac.docx]

**High-Performance, Temperature Retardant and Hydrophobic BiCoO₃:PDMS Piezoelectric Nanogenerator for Effective Energy Harvesting in Harsh Environments**

Dhiraj Kumar Bharti1,2*, Sandeep Kumar,3,4 Jitendra Pratap Singh1,2*

*1Nanoscale Research Facility, Indian Institute of Technology Delhi, Hauz Khas, New Delhi 110016, India*

*2Department of Physics, Indian Institute of Technology Delhi, Hauz Khas, New Delhi 110016, India*

*3Department of Chemistry, Indian Institute of Technology Delhi, Hauz Khas, New Delhi 110016, India*

*4Department of Chemistry, Motilal Nehru College, University of Delhi, Benito Juarez Marg, New Delhi 110021, India*

**Corresponding author: E-mail:* *jpsingh@physics.iitd.ac.in, dbharti5141@gmail.com; Telephone: 011-26591323 Fax 011-26591323*


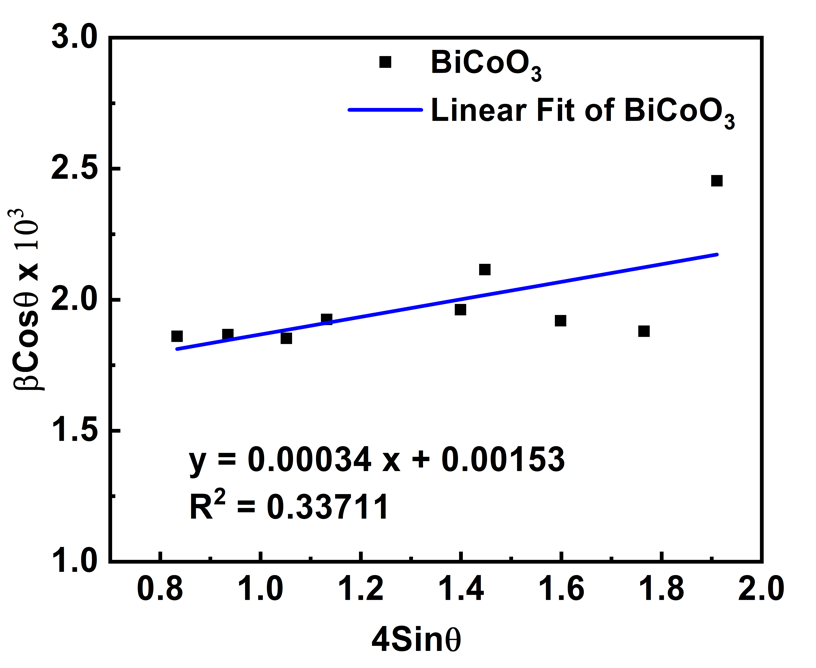


**Fig. S1.** Williamson-Hall of BiCoO3 nanoparticles


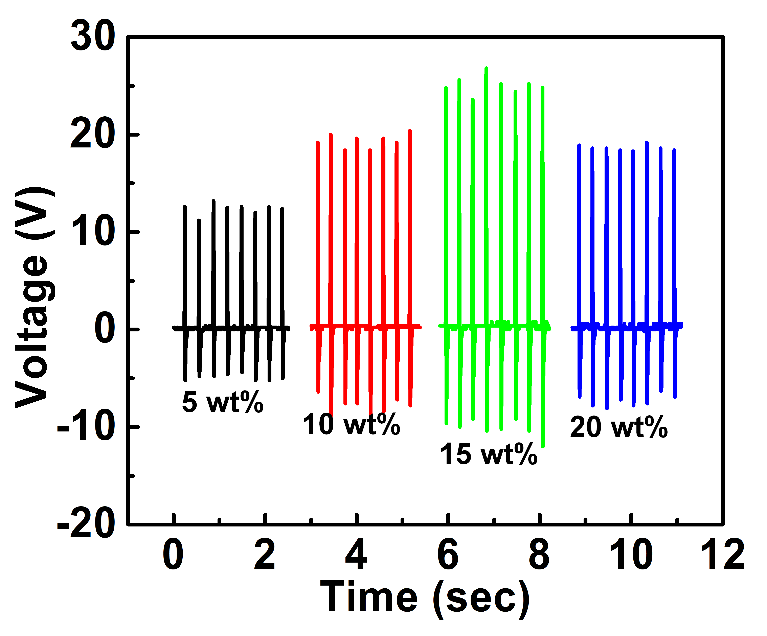


**Fig. S2.** Output voltage response of PENG measured at different concentrations of BiCoO3 in PDMS matrix.


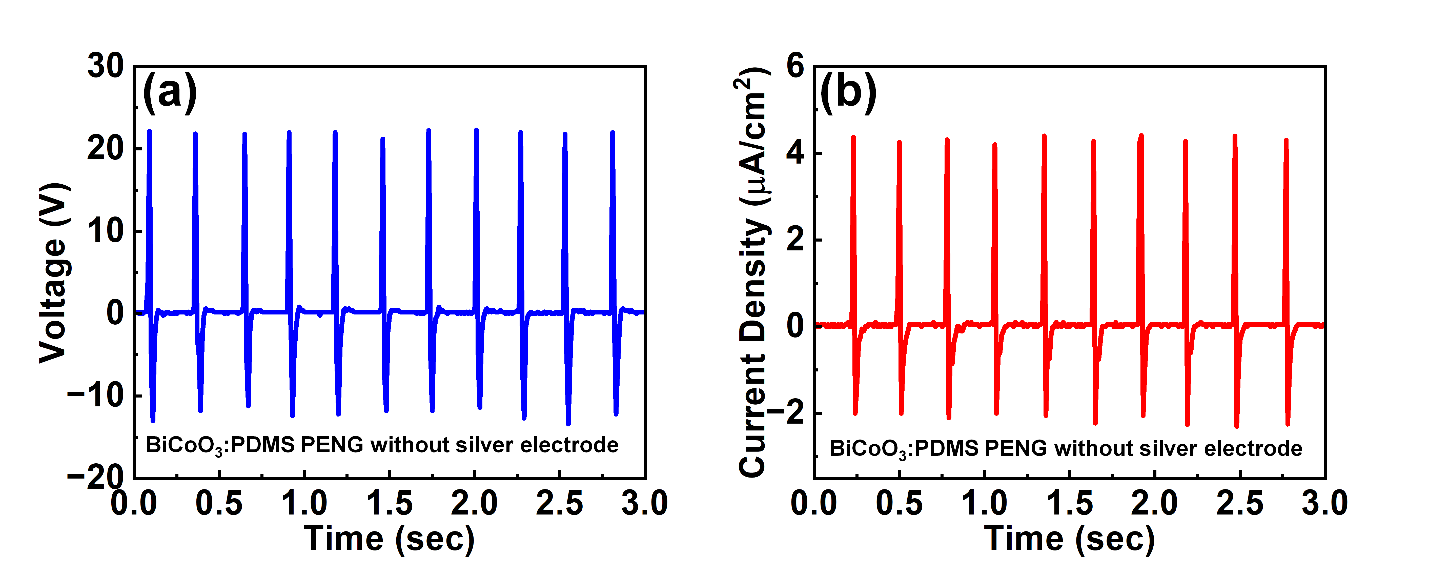


**Fig. S3. a** Output voltage and **b** current density of the PENG with ITO/PET as a counter electrode under the 0.15 kgf force.


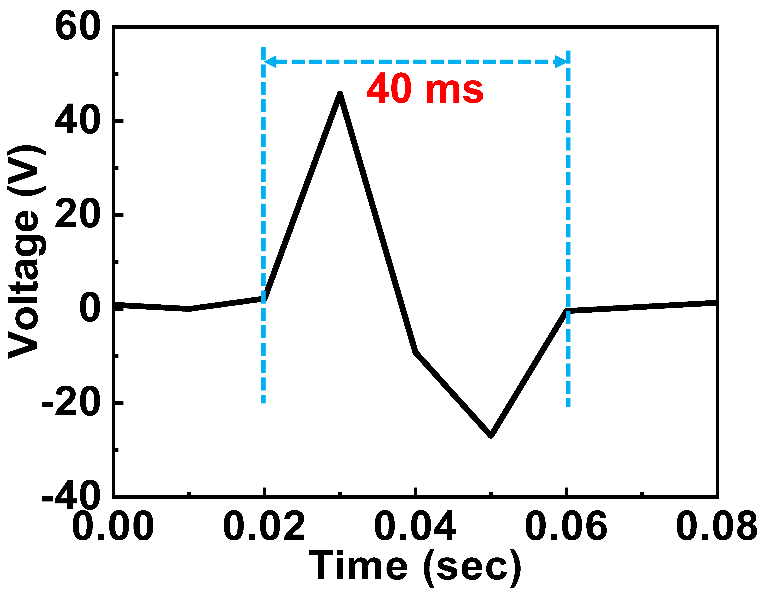


**Fig. S4.** Response time of PENG.


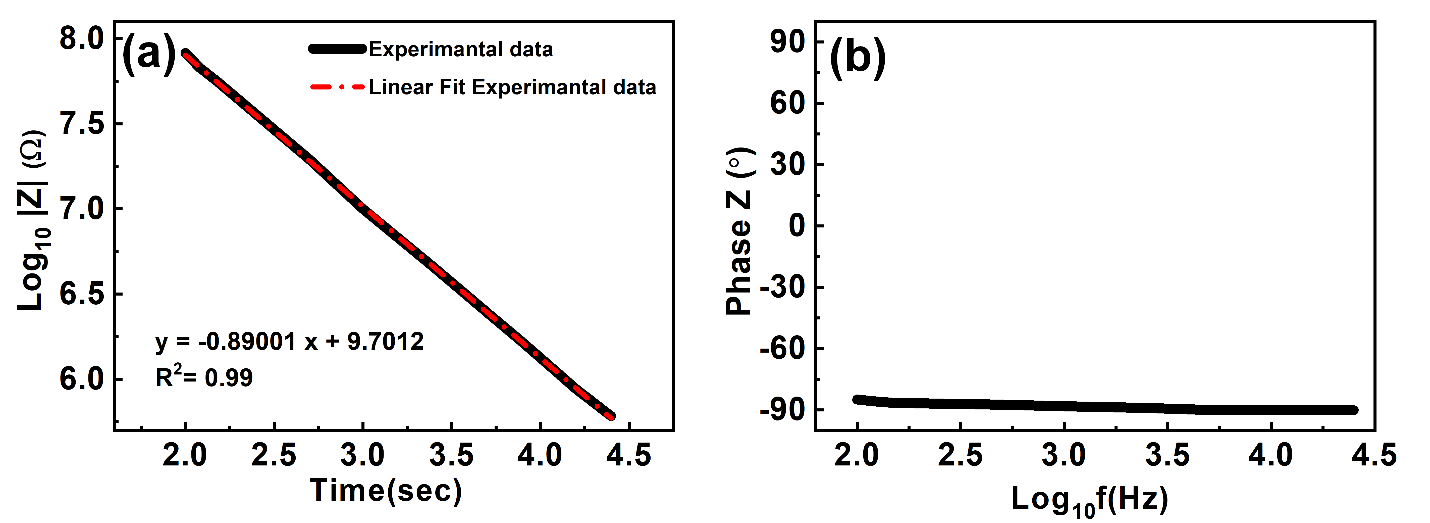


**Fig. S5. a** logarithm plot between the Z modulus vs applied frequency and **b** logarithmic graph between the Z phase vs applied frequency of BiCoO3:PDMS nanocomposite film.


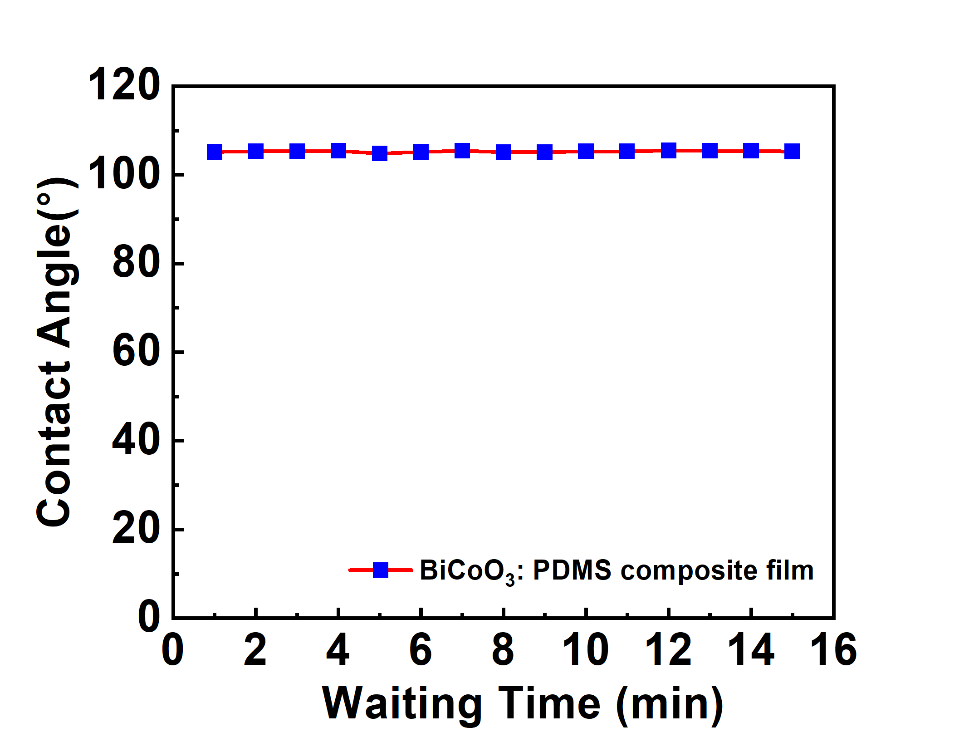


**Fig. S6.** The waiting time vs contact angle of water on BiCoO3:PDMS nanocomposite film.

Parameters of Contact Angle measurements are:

1. Fitting Method: Young Laplace
2. DropType: Sessile drop
3. Temperature: 25 °C
4. Drop phase: water
5. Surrounding phase: Air
6. Gravitational acceleration: 9.80665 m/s2

**Section S7.** Calculation of cost per Piezoelectric Nanogenerator

1. Price of ITO coated PET substrate (4 cm x 2 cm) = $ 0.31

2. Cost of chemical utilized per device = $ 0.816

3. Overhead Charges (8%) = $ 0.08

**Video V1:** https://drive.google.com/file/d/1ra0L7k4sarICaiCg9XvYZyQRu_7WeRgo/view?usp=share_link
